# Supplementary material for: Tumor Regression Following Engineered Polyomavirus-Specific T Cell Therapy in Immune Checkpoint Inhibitor-Refractory Merkel Cell Carcinoma
Source: PubMed Central journal article supplement — medRxiv. 2024 Jul 5:2024.07.01.24309780. Preprint. [Version 1] doi: 10.1101/2024.07.01.24309780 (PMC11245074; doi:10.1101/2024.07.01.24309780), 2024-07-05

**Supplementary Figure 1. TCR<sub>MCC1</sub> is neither self- nor alloreactive**

**a** IFN $\gamma$  production of CD8 T<sub>TCR-MCC1</sub> cells upon coculture with T2 cells loaded with alanine mutants of LTA<sub>g15-23</sub>. Positive cell frequency was normalized by the mean values of unmutated LTA<sub>g15-23</sub>. **b** IFN $\gamma$  production of CD8 T<sub>TCR-MCC1</sub> cells upon coculture with T2 cells loaded with indicated self-peptides that has a similar sequence to that of LTA<sub>g15-23</sub>. LTA<sub>g15-23</sub> was used as a positive control. **c** Dermal fibroblasts expressing HLA-A2 and ABCG2. **d** IFN $\gamma$  production of CD8

T<sub>TCR-MCC1</sub> cells upon coculture with indicated human dermal fibroblasts. **e** IFN $\gamma$  production of CD8 T<sub>TCR-MCC1</sub> cells upon coculture with indicated LCLs. LTA<sub>15-23</sub>-loaded T2 cells was used as a positive control.

**Supplementary Figure 2. IFN $\gamma$  upregulates HLA on MCC cell lines.**

**a** HLA-A2 expression on WaGa cells measured after a 3-day culture with the indicated reagents. **b** NeonGreen expression frequency in Jurkat reporter cells after overnight coculture with WaGa cells pre-treated as in (a). **c** In vitro coculture assay using TCR<sub>MCC1</sub>-transduced primary CD8+ T cells against WaGa cells with or without 3-day pre-treatment with 10 ng/mL IFN $\gamma$ . **d** HLA-A2 expression on MCC cell lined with the indicated pre-treatment.

**Supplementary Figure 3. Clinical trial scheme.**

**Supplementary Figure 4. LDC increased serum concentrations of IL-15 and IL-7.**

**Supplementary Figure 5. T<sub>TCR-MCC1</sub> infiltration and T cell phenotypes in tumor.**

**a** CD3/WPRE IHC in Pt 3 infusion 1 day 56 tumor. **b** TCR<sub>MCC1</sub> transcript expression on the UMAP embedding. **c** Heatmap showing expression of top-10 marker genes for T cell sub-clusters. **d** Representative marker genes expression for T cell sub-clusters on the UMAP embedding.

**Supplementary Figure 6. Heatmaps of marker genes for cell clusters identified in Pt 6 tumor.**

**a, b** Marker gene heatmaps for major cell types (a) and T/NK sub-clusters (b).

**Supplementary Figure 7. Pt 6 old infusion clonotype and T<sub>TCRMCC1</sub> cells show distinct phenotypes in tumor.**

**a** Clonotypes in the Pt 6 old infusion product targeting sTA<sub>g83-91</sub>. **b** Distribution of old infusion clonotypes specific to LTA<sub>g15-23</sub> projected on the UMAP. **c** Expression of *PDCD1* and *LAG3*, two marker genes of the T cell sub-cluster “2: T, late activated.” **d** TCR<sub>MCC1</sub> transcript expression on the UMAP embedding. **e** Frequency of T<sub>TCR-MCC1</sub> cells in T cell sub-clusters in Pt 6 tumor.

# Supplementary Figure 1

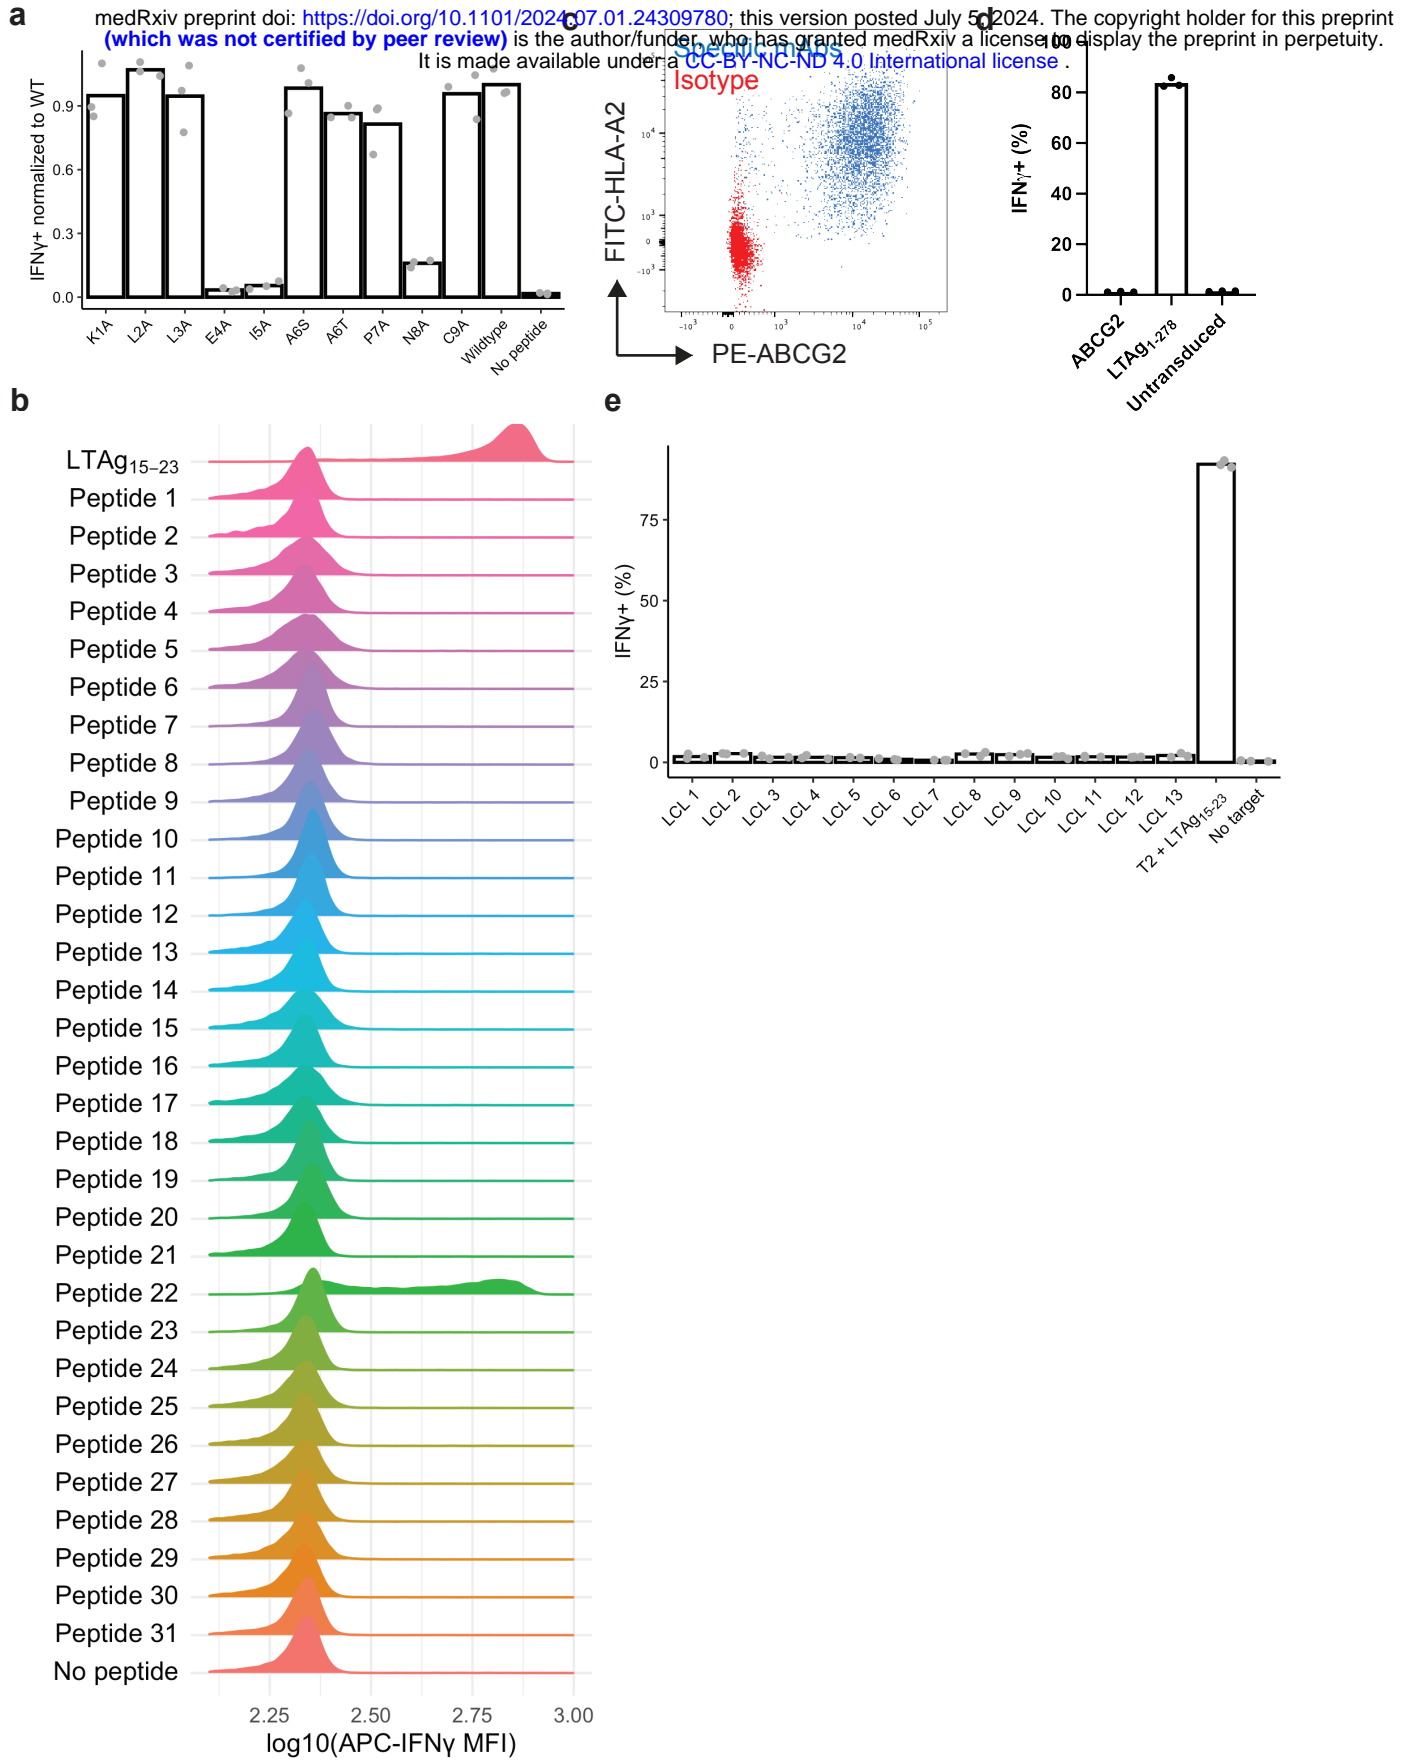



## Supplementary Figure 2

medRxiv preprint doi: <https://doi.org/10.1101/2024.07.01.24309780>; this version posted July 5, 2024. The copyright holder for this preprint (which was not certified by peer review) is the author/funder, who has granted medRxiv a license to display the preprint in perpetuity. It is made available under a [CC-BY-NC-ND 4.0 International license](#).

**a**

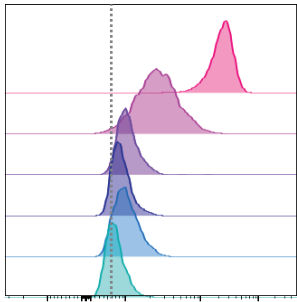

IFN $\gamma$  10 ng/mL  
IFN $\beta$  100 ng/mL  
Valproic acid 250  $\mu$ M  
Panobinostat 1 nM  
5-azacytidine 10  $\mu$ M  
No treatment

→ FITC-HLA-A2

**b**

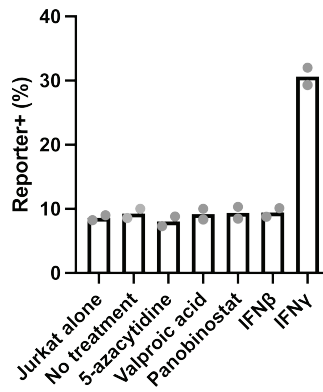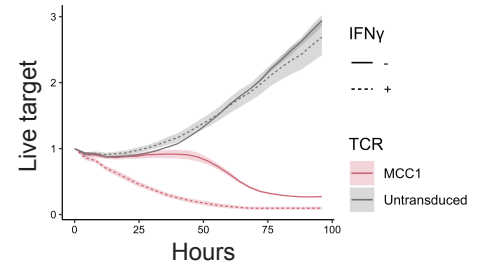

**d**

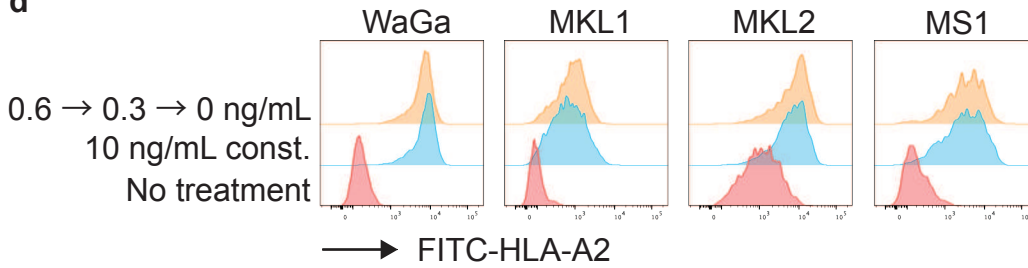

### Supplementary Figure 3

medRxiv preprint doi: <https://doi.org/10.1101/2024.07.01.24309780>; this version posted July 5, 2024. The copyright holder for this preprint (which was not certified by peer review) is the author/funder, who has granted medRxiv a license to display the preprint in perpetuity. It is made available under a [CC-BY-NC-ND 4.0 International license](https://creativecommons.org/licenses/by-nc-nd/4.0/).

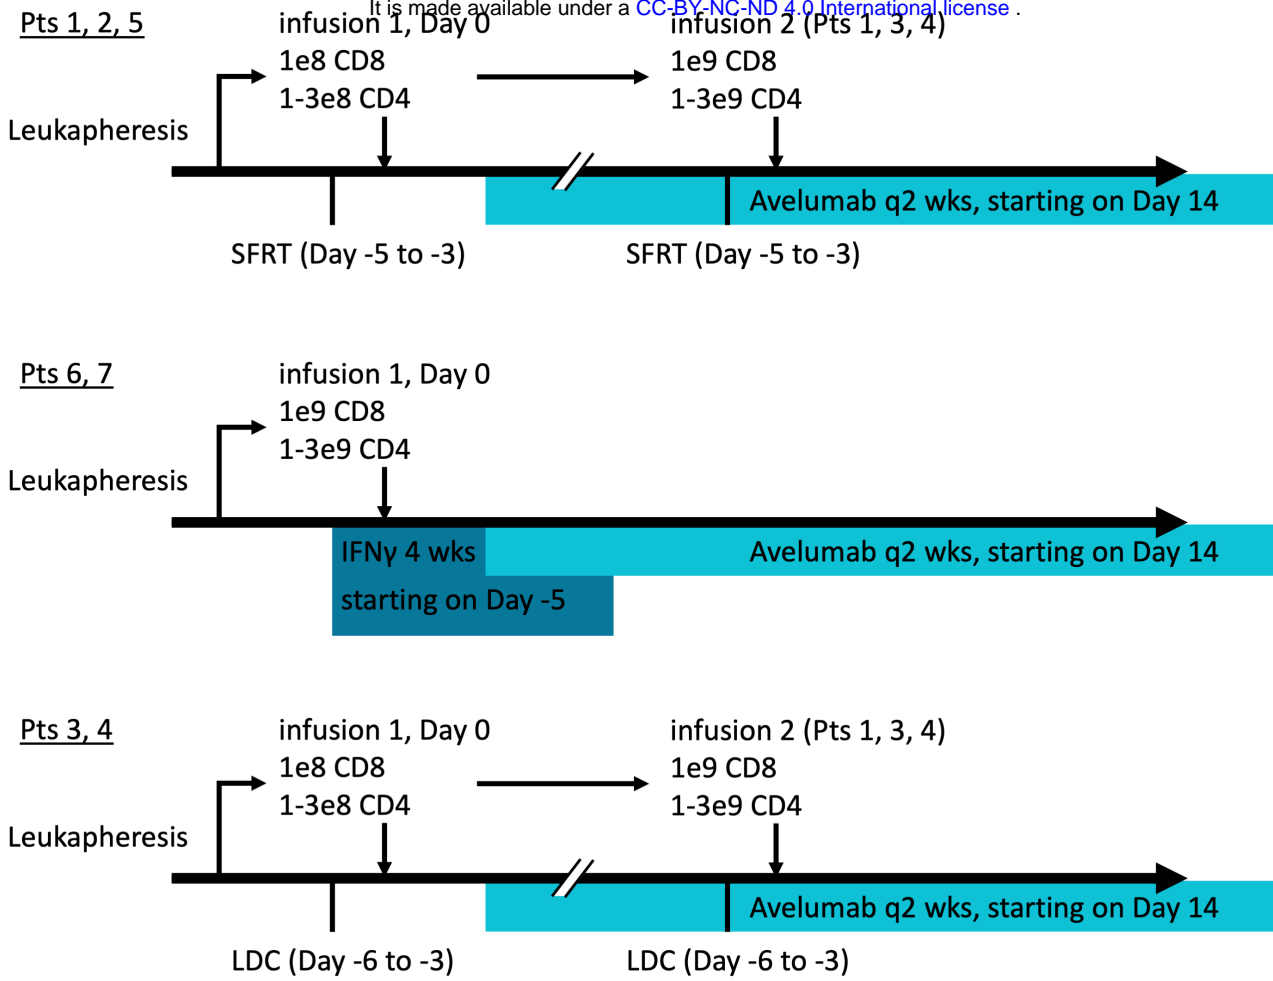

## Supplementary Figure 4

medRxiv preprint doi: <https://doi.org/10.1101/2024.07.01.24309780>; this version posted July 5, 2024. The copyright holder for this preprint (which was not certified by peer review) is the author/funder, who has granted medRxiv a license to display the preprint in perpetuity. It is made available under a [CC-BY-NC-ND 4.0 International license](#).

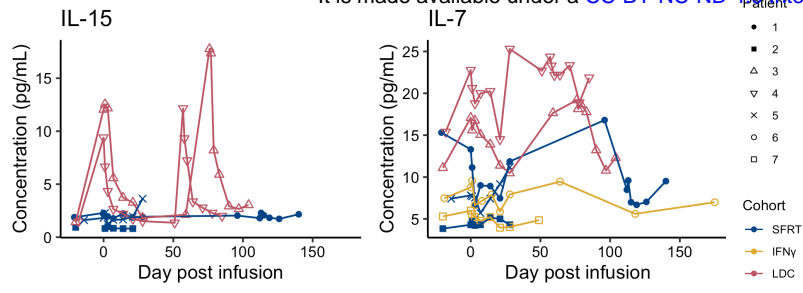

# Supplementary Figure 5

medRxiv preprint doi: <https://doi.org/10.1101/2024.07.01.24309780>; this version posted July 5, 2024. The copyright holder for this preprint (which was not certified by peer review) is the author/funder, who has granted medRxiv a license to display the preprint in perpetuity. It is made available under a [CC-BY-NC-ND 4.0 International license](https://creativecommons.org/licenses/by-nc-nd/4.0/).

a

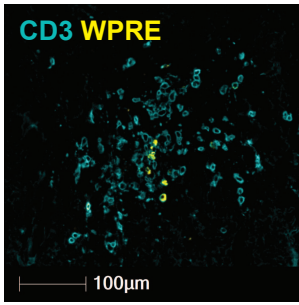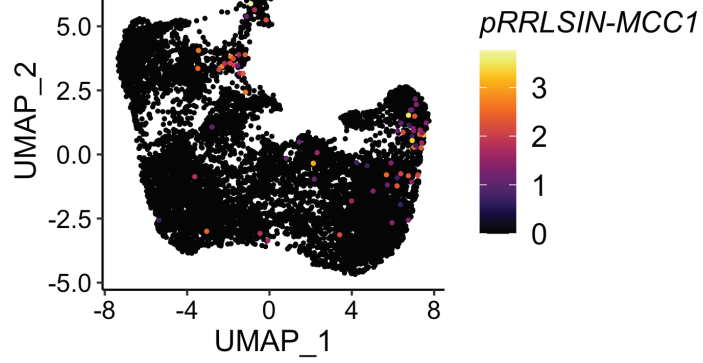

c

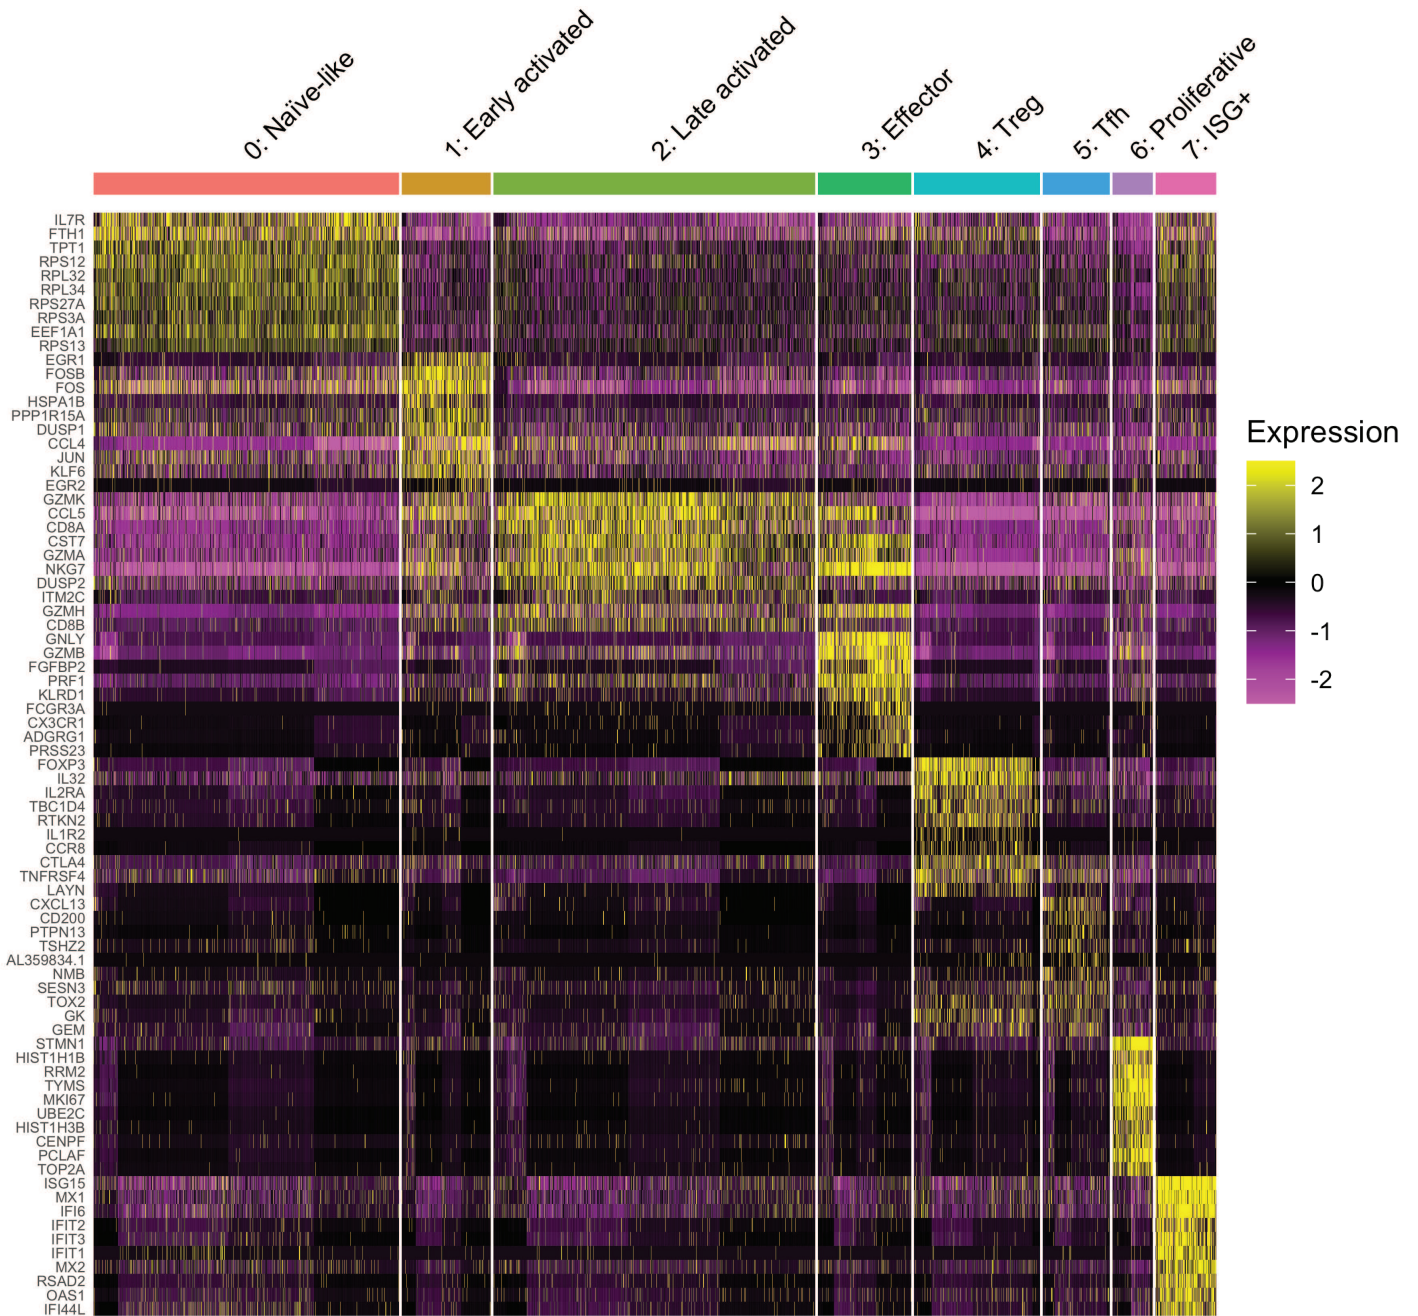

## Supplementary Figure 5 (continued)

d medRxiv preprint doi: <https://doi.org/10.1101/2024.07.01.24309780>; this version posted July 5, 2024. The copyright holder for this preprint (which was not certified by peer review) is the author/funder, who has granted medRxiv a license to display the preprint in perpetuity. It is made available under a [CC-BY-NC-ND 4.0 International license](https://creativecommons.org/licenses/by-nc-nd/4.0/).

### 0: Naïve-like

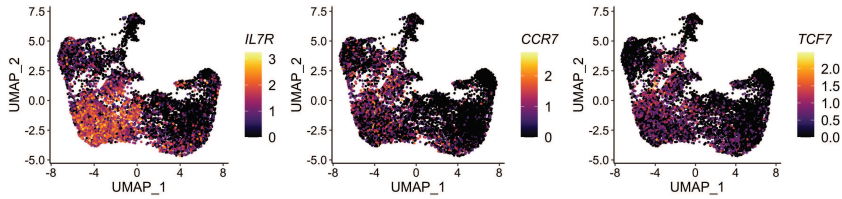

### 1: Early activated

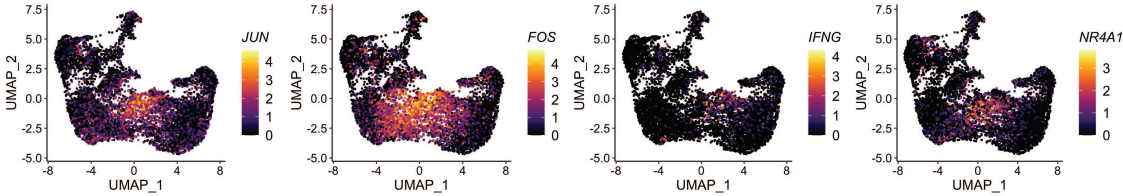

### 2: Late activated

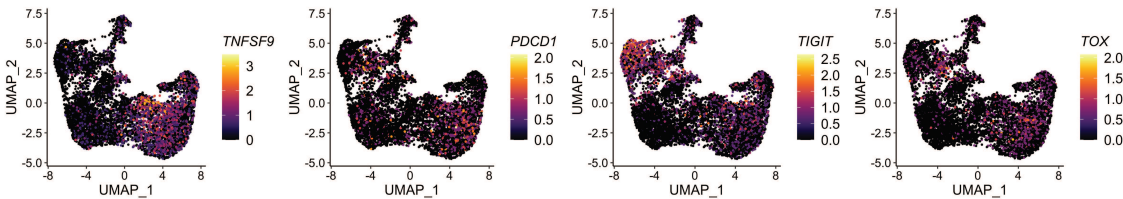

### 3: Effector

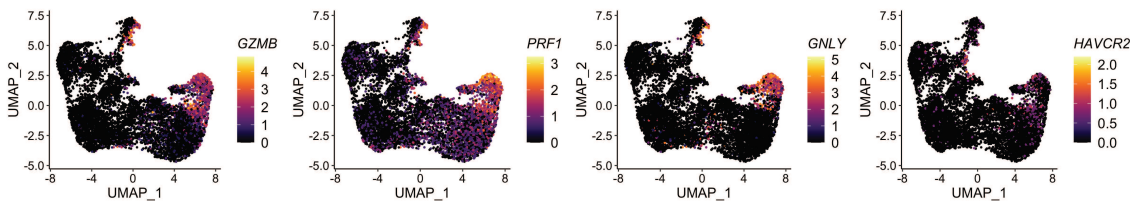

### 4: Treg

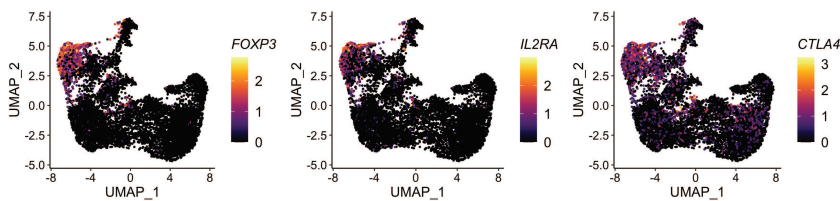

### 5: Tfh

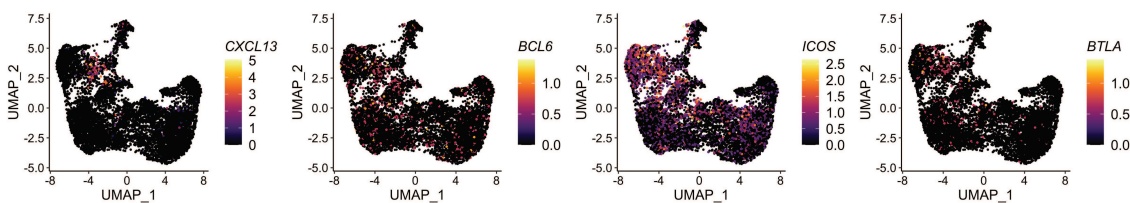

### 6: Proliferative

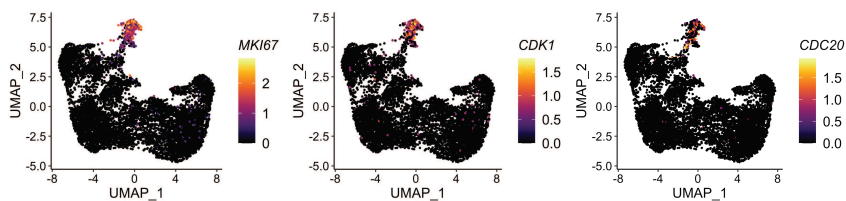

### 7: ISG+

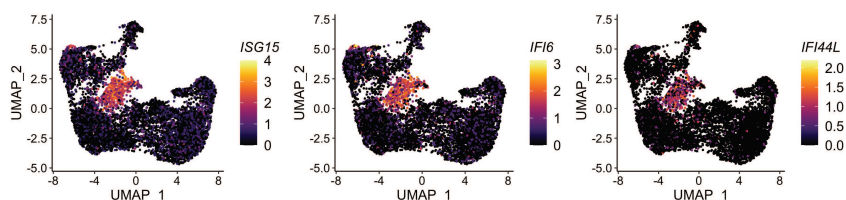





## Supplementary Figure 7

medRxiv preprint doi: <https://doi.org/10.1101/2024.07.01.24309780>; this version posted July 5, 2024. The copyright holder for this preprint (which was not certified by peer review) is the author/funder, who has granted medRxiv a license to display the preprint in perpetuity. It is made available under a [CC-BY-NC-ND 4.0 International license](https://creativecommons.org/licenses/by-nc-nd/4.0/).

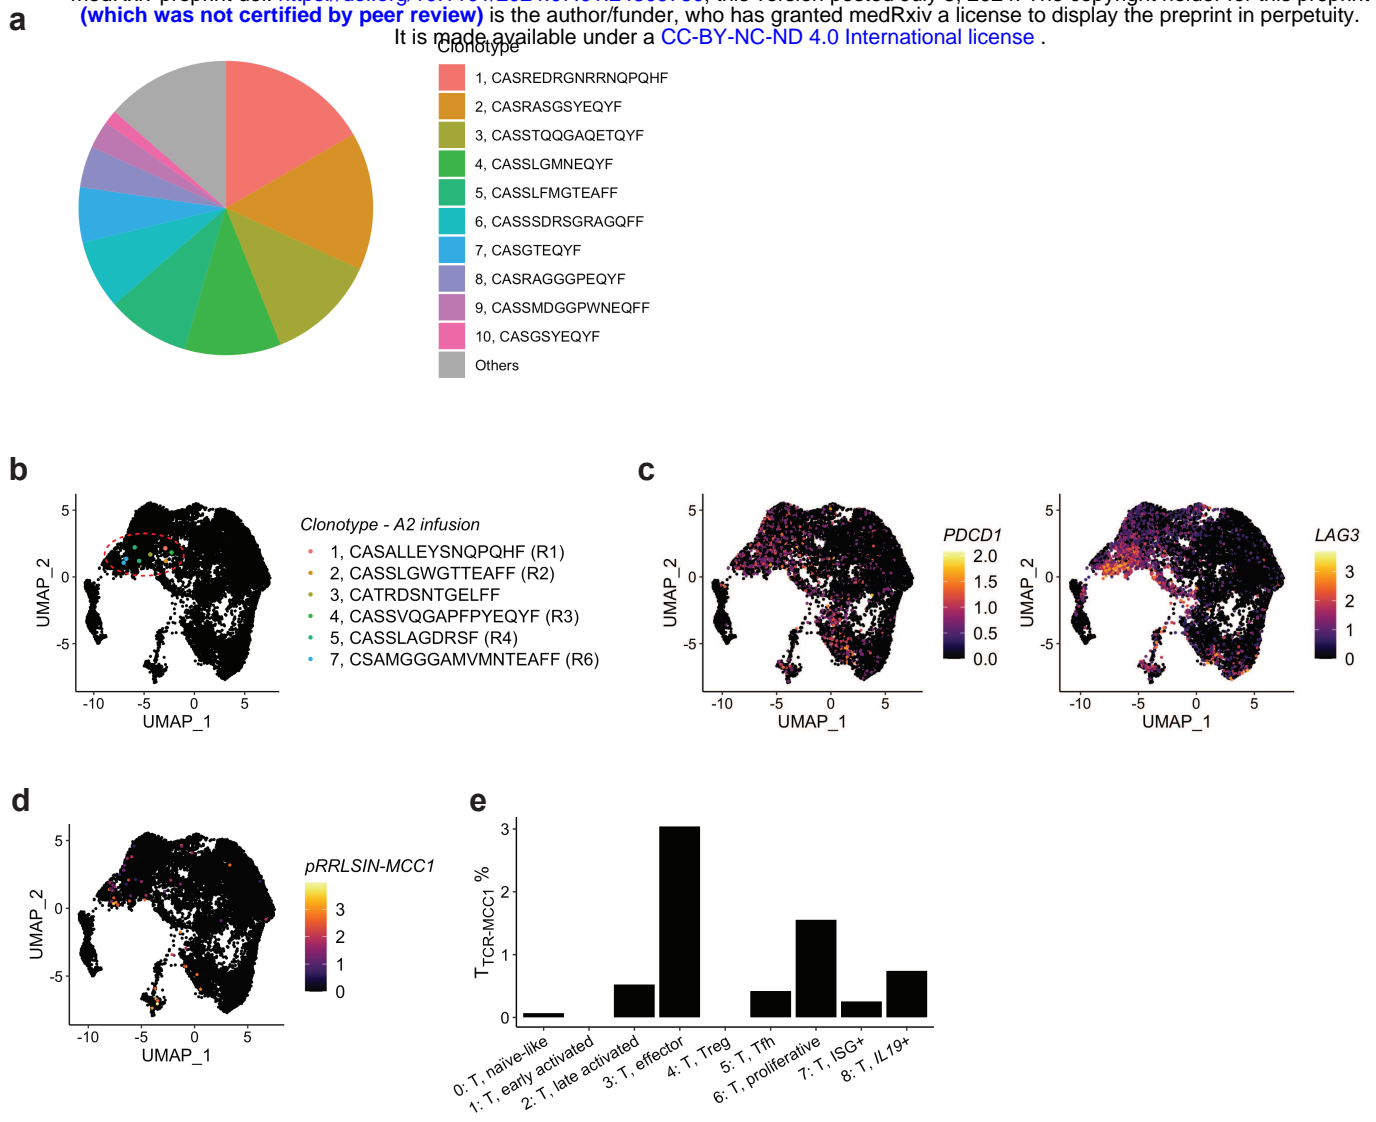

Supplement: NIHPP2024.07.01.24309780v1-supplement-1.pdf [file NIHPP2024.07.01.24309780v1-supplement-1.pdf]
